# Supplementary material
Source: publisher figshare collection journal article supplement (https://tandf.figshare.com/articles/dataset/_/5629972)
Supplement: Supplementary file 1 [file 1]

**Appendix A.** Ovid search strategies.

| Ovid MEDLINE(R) Epub Ahead of Print, In-Process & Other Non-Indexed Citations, Ovid MEDLINE(R) Daily and Ovid MEDLINE(R) <1946 to Present>.<br>Search date: 28 June 2017 |                                                      |            |
|--------------------------------------------------------------------------------------------------------------------------------------------------------------------------|------------------------------------------------------|------------|
| Step                                                                                                                                                                     |                                                      | n          |
| 1                                                                                                                                                                        | hyperthermia, induced/                               | 14817      |
| 2                                                                                                                                                                        | (hyperthermia or thermotherapy or thermal).ab,kf,ti. | 178091     |
| 3                                                                                                                                                                        | hyperthermia.jw.                                     | 2269       |
| 4                                                                                                                                                                        | or/1-3 [hyperthermia]                                | 184321     |
| 5                                                                                                                                                                        | pancreatic neoplasms/ or pancreas/                   | 122954     |
| 6                                                                                                                                                                        | (Pancreatic or pancreas).ab,jw,kf,ti.                | 224172     |
| 7                                                                                                                                                                        | 5 or 6                                               | 248505     |
| 8                                                                                                                                                                        | 4 and 7                                              | 843        |
| 9                                                                                                                                                                        | remove duplicates from 8                             | <b>824</b> |

| Embase Classic+Embase <1947 to 2017 June 26>. Ovid interface.<br>Search date: 28 June 2017 |                                                                  |             |
|--------------------------------------------------------------------------------------------|------------------------------------------------------------------|-------------|
| Step                                                                                       |                                                                  | n           |
| 1                                                                                          | thermotherapy/ or exp hyperthermia/ or onco hyperthermia device/ | 27067       |
| 2                                                                                          | (hyperthermia or thermotherapy or thermal).ab,kw,ti.             | 194866      |
| 3                                                                                          | hyperthermia.jx.                                                 | 2372        |
| 4                                                                                          | (hypertherm* or thermotron).dv.                                  | 45          |
| 5                                                                                          | or/1-4 [hyperthermia]                                            | 203696      |
| 6                                                                                          | pancreas tumor/ or exp pancreas cancer/                          | 103352      |
| 7                                                                                          | (Pancreatic or pancreas).ab,jx,kw,ti.                            | 309358      |
| 8                                                                                          | 6 or 7                                                           | 332029      |
| 9                                                                                          | 5 and 8                                                          | 1145        |
| 10                                                                                         | remove duplicates from 9                                         | <b>1115</b> |

n, number of records.
