# Supplementary material
Source: publisher figshare collection journal article supplement (https://tandf.figshare.com/articles/dataset/_/5629972)
Supplement: Supplementary file 2 [file 1]

**Suppl. Table S1.** Level of evidence and risk of bias assessment; indication of the reliability of the included studies.

| Study                            | n          | Control group | Random allocation | Level of evidence <sup>a</sup> | Study design | Blinding | Selective reporting bias | Missing data verified bias | Follow up bias | Confounding factor | Comparable groups bias |
|----------------------------------|------------|---------------|-------------------|--------------------------------|--------------|----------|--------------------------|----------------------------|----------------|--------------------|------------------------|
| Kouloulis et al. 2002 [57]       | 37         | Yes           | No                | 3                              | Pro          | No       | Low                      | –                          | NR             | Low                | Low                    |
| Ohguri et al. 2008 [60]          | 29         | Yes           | No                | 3                              | Retro        | No       | Low                      | Low                        | Low            | High               | Low                    |
| Yamada et al. 1992 [54]          | 73         | Yes           | No                | 3                              | Retro        | No       | High                     | –                          | NR             | High               | Low                    |
| Maluta et al. 2011 [62]          | 68         | Yes           | No                | 3                              | Pro          | No       | Low                      | High                       | Low            | High               | Medium                 |
| Ashayeri et al. 1993 [55]        | 24         | Yes           | No                | 4                              | Retro        | No       | Low                      | Low                        | NR             | Low                | Low                    |
| Maebayashi et al. 2017 [66]      | 13         | Yes           | No                | 3                              | Retro        | No       | Low                      | –                          | NR             | High               | Medium                 |
| Douwes 2006 [58]                 | 30         | No            | –                 | 4                              | Retro        | No       | Low                      | –                          | NR             | Low                | –                      |
| Tschoep-Lechner et al. 2013 [64] | 23         | No            | –                 | 4                              | Retro        | No       | Low                      | Low                        | NR             | High               | –                      |
| Volovat et al. 2014 [65]         | 19         | No            | –                 | 4                              | Pro          | No       | Low                      | Low                        | NR             | High               | –                      |
| Ishikawa et al. 2012 [63]        | 18         | No            | –                 | 4                              | Phase II     | No       | Low                      | –                          | NR             | Low                | –                      |
| Bakshandeh-Bath et al. 2009 [61] | 13         | No            | –                 | 4                              | Retro        | No       | Low                      | –                          | NR             | Low                | –                      |
| Kouloulis et al. 2001 [56]       | 7          | No            | –                 | 4                              | Pro          | No       | Low                      | –                          | Low            | Low                | –                      |
| Kakehi et al. 1990 [53]          | 34         | No            | –                 | 4                              | Retro        | No       | Low                      | –                          | NR             | High               | –                      |
| Bull et al. 2008 [59]            | 7          | No            | –                 | 4                              | Phase I/II   | No       | Low                      | –                          | NR             | High               | –                      |
| <b>Overall</b>                   | <b>395</b> | <b>6/14</b>   | <b>0/6</b>        | <b>3–4</b>                     |              |          |                          |                            |                |                    |                        |
|                                  |            | <b>(43%)</b>  |                   |                                |              |          |                          |                            |                |                    |                        |

–, not applicable; NR, not reported; Retro, retrospective; Pro, prospective

<sup>a</sup> OCEBM level 3: Non-randomized controlled cohort/follow-up study; level 4: Case-series, case-control studies, or historically controlled studies [40]
